# Supplementary material for: De novo variants in congenital diaphragmatic hernia identify MYRF as a new syndrome and reveal genetic overlaps with other developmental disorders
Source: PubMed Central journal article supplement (PMC6301721; doi:10.1371/journal.pgen.1007822), 2018-12-10
Supplement: pgen.1007822.s001.pdf [file pgen.1007822.s001.pdf]

**S1 Fig. Depth of coverage.**

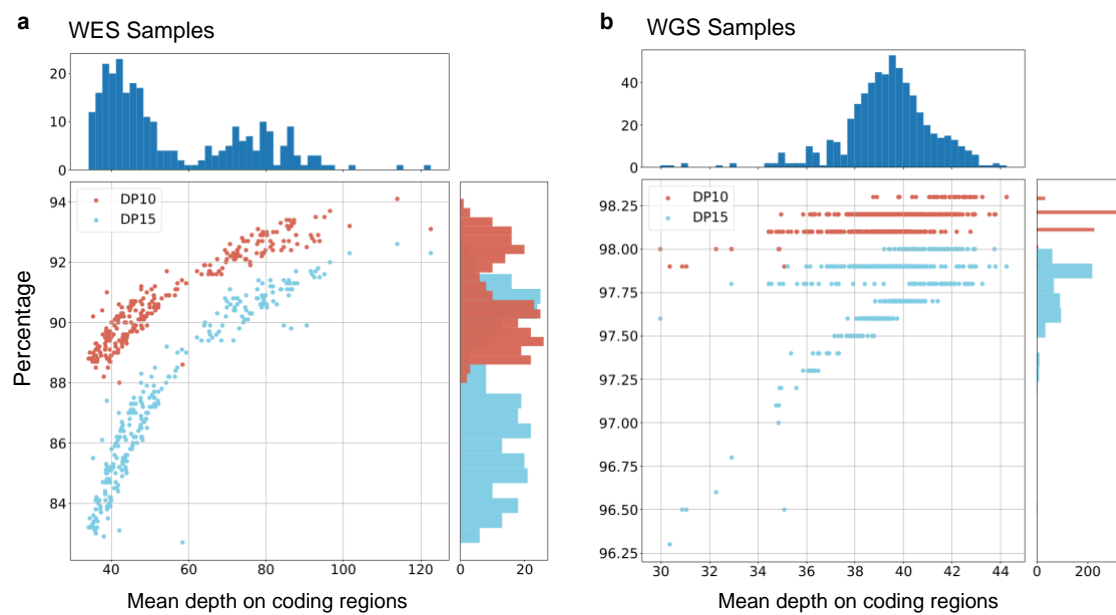

DP10/DP15 is the percentage of targeted regions that are covered by at least 10/15 unique reads. Scatter plot and marginal histograms for mean depth and DP10/DP15 are shown for 79 whole-exome sequencing (WES) trios (a) and 192 whole-genome sequencing (WGS) trios (b). Coverage statistics were calculated on the coding regions (including canonical splice sites) of GENCODE genes (v19).
