# Supplementary material for: De novo variants in congenital diaphragmatic hernia identify MYRF as a new syndrome and reveal genetic overlaps with other developmental disorders
Source: PubMed Central journal article supplement (PMC6301721; doi:10.1371/journal.pgen.1007822), 2018-12-10
Supplement: pgen.1007822.s002.pdf [file pgen.1007822.s002.pdf]

**S2 Fig. Distribution of *de novo* coding variants per proband.**

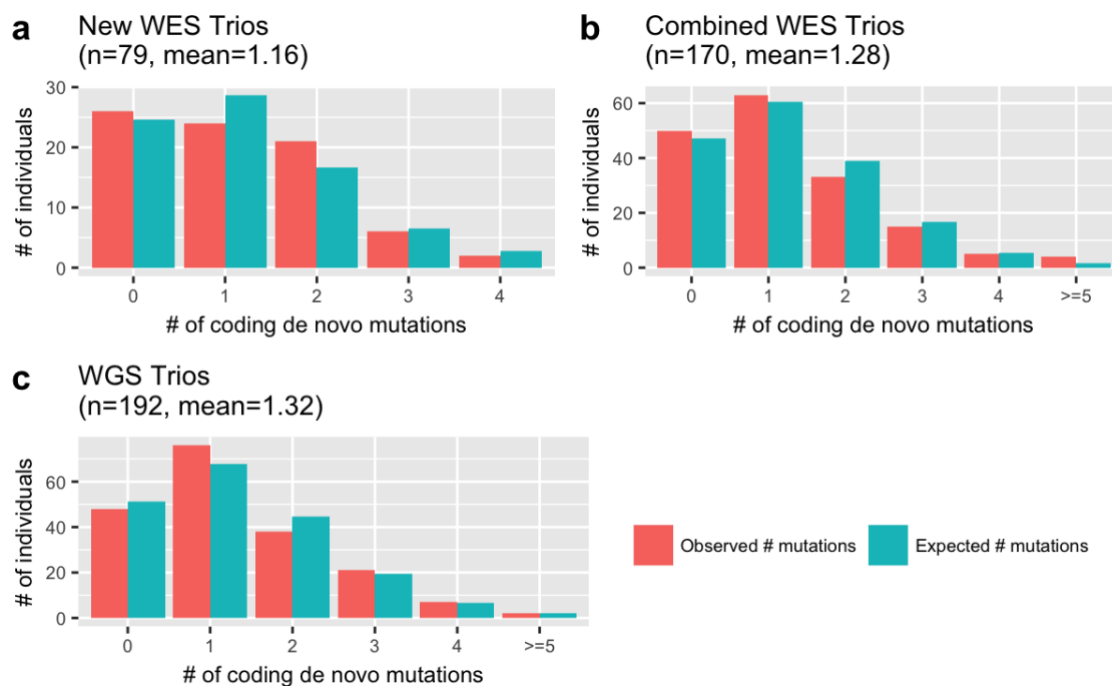

Distribution of number of *de novo* coding variants per proband in whole-exome (WES, top) and whole-genome sequencing (WGS, bottom) trios. The WES trios include 79 trios sequenced in this study, and 91 trios that were previously published. Twenty-seven published WES trios that were sequenced again by WGS were only included in the WGS analysis.

The observed number of variants were compared with the expectation assuming a Poisson distribution with mean equals to the average number of variants per proband.
