# Supplementary material for: De novo variants in congenital diaphragmatic hernia identify MYRF as a new syndrome and reveal genetic overlaps with other developmental disorders
Source: PubMed Central journal article supplement (PMC6301721; doi:10.1371/journal.pgen.1007822), 2018-12-10
Supplement: pgen.1007822.s003.pdf [file pgen.1007822.s003.pdf]

### S3 Fig. Multiple sequence alignment (MSA) of MYRF protein domains.

#### a DBD domain

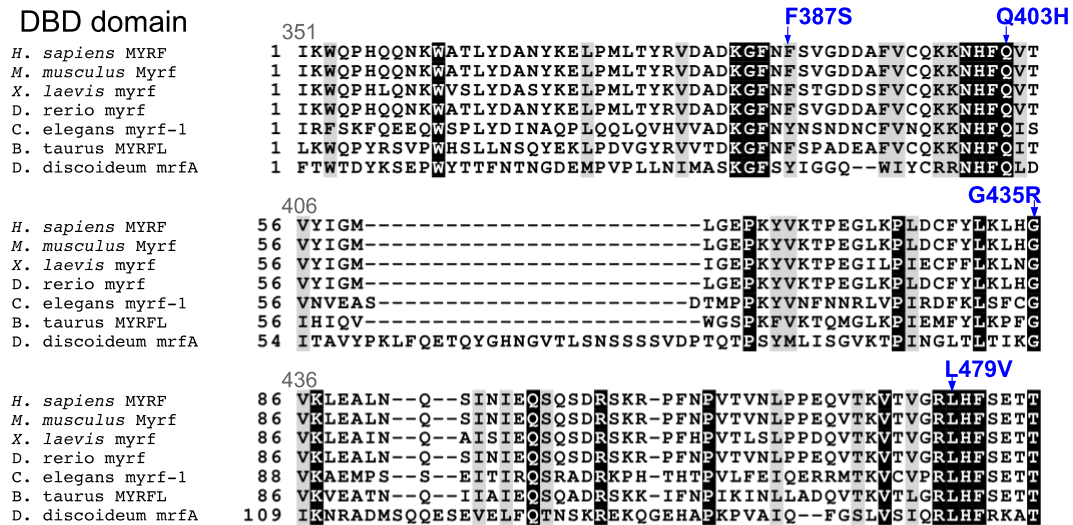

#### b ICA domain

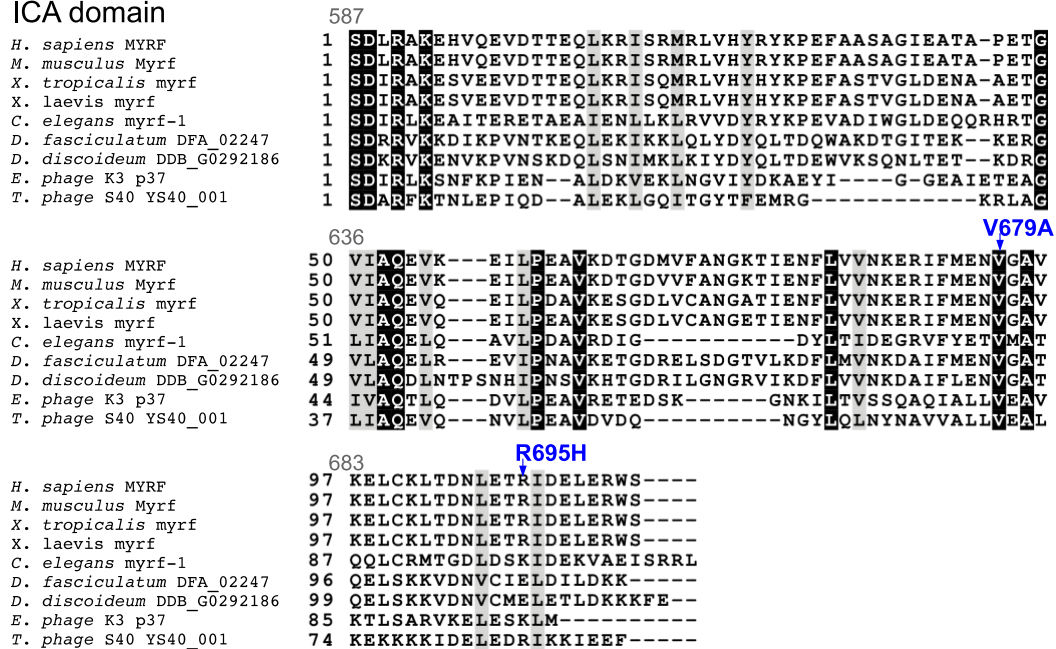

Homologous protein sequences from UniProtKB/Swiss-Prot were searched by BLASTP (<https://blast.ncbi.nlm.nih.gov/Blast.cgi?PAGE=Proteins>). Selected ortholog sequences on DBD and ICA domains were aligned using Clustal Omega (Sievers, Wilm et al. 2011), and the resulting MSA were then visualized by BoxShade ([https://embnet.vital-it.ch/software/BOX\\_form.html](https://embnet.vital-it.ch/software/BOX_form.html)). Residues that are completely conserved are highlighted in black; changes to residues with similar biochemical properties are shaded in gray. Amino acid substitutions that result from *de novo* missense variants are shown above the MSA. Most substitutions affect highly conserved residues.
