# Supplementary material for: De novo variants in congenital diaphragmatic hernia identify MYRF as a new syndrome and reveal genetic overlaps with other developmental disorders
Source: PubMed Central journal article supplement (PMC6301721; doi:10.1371/journal.pgen.1007822), 2018-12-10
Supplement: pgen.1007822.s006.pdf [file pgen.1007822.s006.pdf]

**S6 Fig. (Related to Fig 1b and 1c) The impact of *MYRF de novo* missense variants on the patients' transcriptome.**

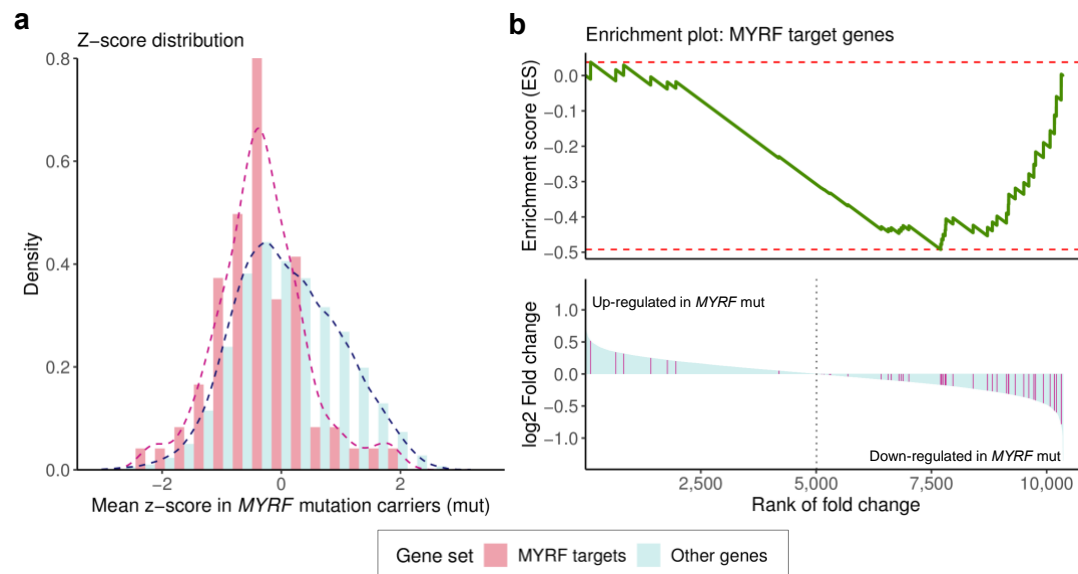

(a) The distribution of mean z-score of gene expressions in two *MYRF de novo* missense variants carriers are shown. *MYRF* target genes are shifted to the left side as compared with other genes ( $P=2.8E-5$  by Kolmogorov-Smirnov test).

(b) Genes were ranked based on the differential expression level comparing two *MYRF* missense variants carriers against cases without *MYRF* variants. *MYRF* target genes on average have lower ranks and majority of them are down-regulated (normalized enrichment score=-1.77,  $P<5.0E-4$ ).
