# Supplementary material for: De novo variants in congenital diaphragmatic hernia identify MYRF as a new syndrome and reveal genetic overlaps with other developmental disorders
Source: PubMed Central journal article supplement (PMC6301721; doi:10.1371/journal.pgen.1007822), 2018-12-10
Supplement: pgen.1007822.s009.pdf [file pgen.1007822.s009.pdf]

**S9 Fig. (Related to Fig 2b) Enrichment of damaging variants in DD/CHD genes not implicated in CDH.**

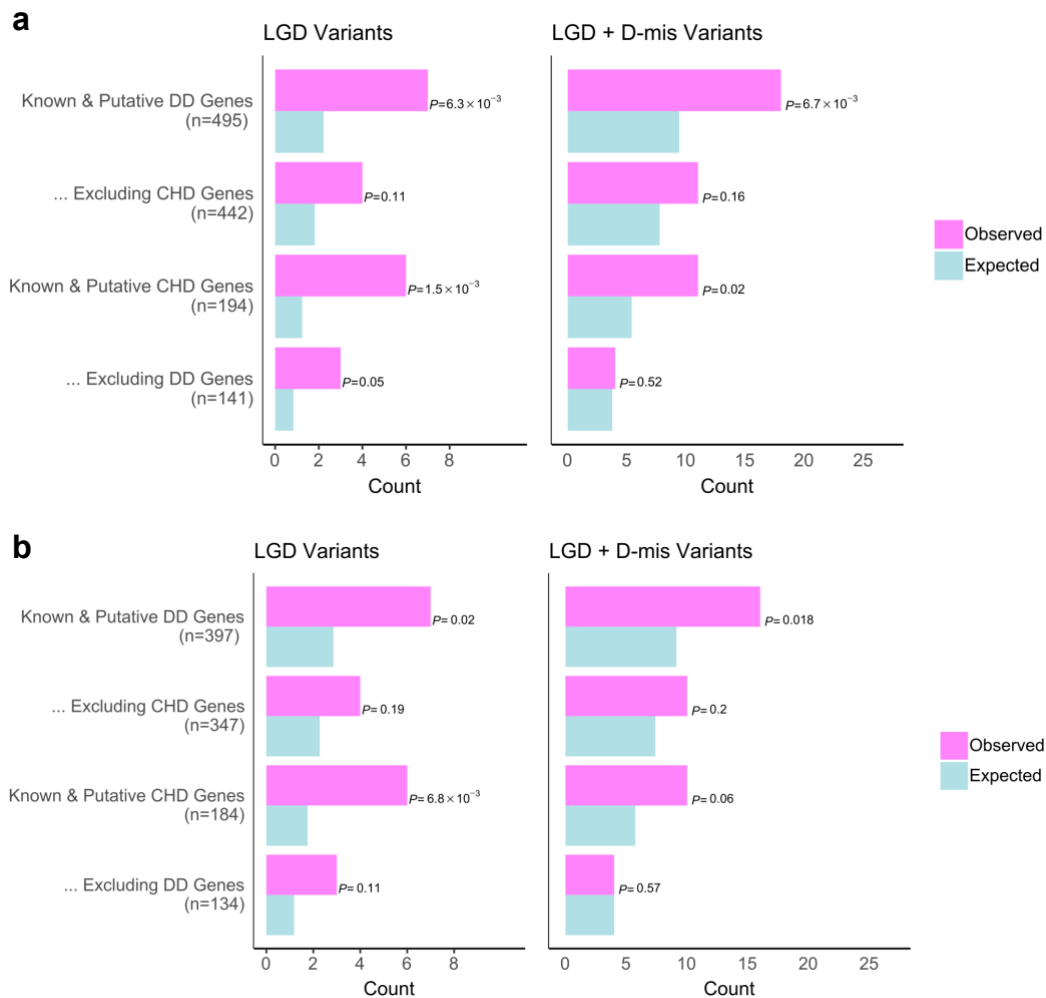

(a) To test the enrichment of *de novo* damaging variants in DD/CHD genes that have not been implicated in CDH, we excluded MYRF and 50 other CDH candidate genes (Longoni, High et al. 2014). Enrichment analysis was performed as described in Materials and Methods. (b) Since most of the overlapping genes were also constrained genes ( $pLI \geq 0.5$ ), we also performed enrichment analysis conditional on constrained genes. *De novo* LGD variants remained significantly enriched in DD/CHD genes.
