# Supplementary material for: De novo variants in congenital diaphragmatic hernia identify MYRF as a new syndrome and reveal genetic overlaps with other developmental disorders
Source: PubMed Central journal article supplement (PMC6301721; doi:10.1371/journal.pgen.1007822), 2018-12-10
Supplement: pgen.1007822.s017.pdf [file pgen.1007822.s017.pdf]

**S2 Tab. (Related to Table 2) Burden of *de novo* variants in different sub-groups of patients.**

| Case group          | Variant class | Number of variants | Baseline expectation | Fold enrichment | P-value         |
|---------------------|---------------|--------------------|----------------------|-----------------|-----------------|
| Complex<br>(n=149)  | Silent        | 44                 | 44.9                 | 0.98            | 0.57            |
|                     | Missense      | 124                | 103.1                | 1.20            | 0.025           |
|                     | D-mis         | 62                 | 38.5                 | <b>1.61</b>     | <b>3.08E-04</b> |
|                     | LGD           | 23                 | 13.5                 | <b>1.70</b>     | <b>0.012</b>    |
| Isolated<br>(n=208) | Silent        | 63                 | 62.7                 | 1.01            | 0.50            |
|                     | Missense      | 165                | 144.0                | 1.15            | 0.046           |
|                     | D-mis         | 74                 | 53.8                 | <b>1.38</b>     | <b>5.22E-03</b> |
|                     | LGD           | 31                 | 18.9                 | <b>1.64</b>     | <b>6.52E-03</b> |
| Female<br>(n=150)   | Silent        | 44                 | 45.9                 | 0.96            | 0.63            |
|                     | Missense      | 118                | 105.6                | 1.12            | 0.12            |
|                     | D-mis         | 64                 | 39.3                 | <b>1.63</b>     | <b>1.85E-04</b> |
|                     | LGD           | 29                 | 13.9                 | <b>2.09</b>     | <b>2.51E-04</b> |
| Male<br>(n=212)     | Silent        | 66                 | 63.2                 | 1.04            | 0.38            |
|                     | Missense      | 177                | 145.1                | 1.22            | 5.63E-03        |
|                     | D-mis         | 74                 | 54.3                 | <b>1.36</b>     | <b>6.45E-03</b> |
|                     | LGD           | 28                 | 19.0                 | <b>1.47</b>     | <b>0.032</b>    |

Five patients were unknown with respect to other congenital anomalies. They were not included in either complex or isolated subgroup.
