# Supplementary material for: De novo variants in congenital diaphragmatic hernia identify MYRF as a new syndrome and reveal genetic overlaps with other developmental disorders
Source: PubMed Central journal article supplement (PMC6301721; doi:10.1371/journal.pgen.1007822), 2018-12-10
Supplement: pgen.1007822.s018.pdf [file pgen.1007822.s018.pdf]

**S3 Tab. Genes affected by multiple *de novo* LGD or missense variants.**

| Gene           | Description                                 | Associated Human Disorders (MIM)                                                                                            | pLI | <i>De novo</i> functional variants | Expected | P-value  |
|----------------|---------------------------------------------|-----------------------------------------------------------------------------------------------------------------------------|-----|------------------------------------|----------|----------|
| <i>MYRF</i>    | Myelin Regulatory Factor                    | -                                                                                                                           | 1   | 1 frameshift, 3 missense           | 0.034    | 5.33E-08 |
| <i>WT1</i>     | Wilms Tumor 1                               | Denys-Drash syndrome (MIM:194080), Frasier syndrome (MIM:136680), Meacham syndrome (MIM:608978), Wilms tumor 1 (MIM:194070) | NA  | 2 missense                         | 0.009    | 4.29E-05 |
| <i>SLC29A4</i> | Solute Carrier Family 29 Member 4           | -                                                                                                                           | 0   | 2 missense                         | 0.019    | 1.78E-04 |
| <i>WDHD1</i>   | WD Repeat And HMG-Box DNA Binding Protein 1 | -                                                                                                                           | 0   | 2 missense                         | 0.024    | 2.94E-04 |
| <i>KIF17</i>   | Kinesin Family Member 17                    | -                                                                                                                           | 0   | 2 missense                         | 0.033    | 5.27E-04 |
| <i>TUBGCP6</i> | Tubulin Gamma Complex Associated Protein 6  | Microcephaly and chorioretinopathy (MIM:251270)                                                                             | 0   | 1 splicing, 1 missense             | 0.056    | 1.53E-03 |
| <i>POLE</i>    | DNA Polymerase Epsilon, Catalytic Subunit   | Colorectal cancer 12 (MIM:615083), Facial dysmorphism, immunodeficiency, livedo, and short stature (MIM:615139)             | 0   | 2 missense                         | 0.068    | 2.22E-03 |
| <i>HSPG2</i>   | Heparan Sulfate Proteoglycan 2              | Dyssegmental dysplasia Silverman-Handmaker type (MIM:224410), Schwartz-Jampel syndrome (MIM:255800)                         | 0   | 2 missense                         | 0.146    | 9.71E-03 |

The observed number of *de novo* functional variants were compared with the expected counts in 362 trios from a baseline mutation model (Samocho, Robinson et al. 2014, Homsy, Zaidi et al. 2015). The significance of recurrence was evaluated by a one-sided Poisson test.
