# Supplementary material for: De novo variants in congenital diaphragmatic hernia identify MYRF as a new syndrome and reveal genetic overlaps with other developmental disorders
Source: PubMed Central journal article supplement (PMC6301721; doi:10.1371/journal.pgen.1007822), 2018-12-10
Supplement: pgen.1007822.s019.pdf [file pgen.1007822.s019.pdf]

**S4 Tab. Pathogenicity prediction of *MYRF* *de novo* missense variants.**

| <b>Variants<br/>(NM_001127392.2)</b> | <b>CADD</b> | <b>MPC</b> | <b>SIFT</b> | <b>PolyPhen</b>      | <b>MetaSVM</b> | <b>M-CAP</b> |
|--------------------------------------|-------------|------------|-------------|----------------------|----------------|--------------|
| c.1160T>C:p.F387S                    | 27.9        | 3.24       | Deleterious | Possibly<br>damaging | Tolerated      | Deleterious  |
| c.1209G>C:p.Q403H                    | 27.6        | 2.38       | Deleterious | Probably<br>damaging | Deleterious    | Deleterious  |
| c.1303G>A:p.G435R                    | 32          | 2.63       | Deleterious | Probably<br>damaging | Deleterious    | Deleterious  |
| c.1435C>G:p.L479V                    | 23.9        | 2.44       | Deleterious | Probably<br>damaging | Deleterious    | Deleterious  |
| c.2036T>C:p.V679A                    | 25.9        | 1.22       | Deleterious | Possibly<br>damaging | Tolerated      | Deleterious  |
| c.2084G>A:p.R695H                    | 34          | 1.24       | Deleterious | Probably<br>damaging | Tolerated      | Deleterious  |
