# Supplementary material for: De novo variants in congenital diaphragmatic hernia identify MYRF as a new syndrome and reveal genetic overlaps with other developmental disorders
Source: PubMed Central journal article supplement (PMC6301721; doi:10.1371/journal.pgen.1007822), 2018-12-10
Supplement: pgen.1007822.s020.pdf [file pgen.1007822.s020.pdf]

**S5 Tab. LGD variants of *MYRF* in general populations.**

| Variant                     | Source          | Functional Consequence (NM_001127392.2) | Variant Class        | Allele Count | Evaluation                                                                                         |
|-----------------------------|-----------------|-----------------------------------------|----------------------|--------------|----------------------------------------------------------------------------------------------------|
| 11:61537790<br>C / CCG      | ExAC            | p.Pro179GlyfsTer30                      | Frameshift insertion | 1/ 68424     | False, mapping artifacts, low allele balance                                                       |
| 11:61539012<br>T / TC       | ExAC            | p.Ser264GlnfsTer74                      | Frameshift insertion | 78/ 120154   | homo-polymer artifacts                                                                             |
| 11:61539012<br>TC / T       | ExAC            | p.Ser264AlafsTer8                       | Frameshift insertion | 1/ 120154    |                                                                                                    |
| 11:61537817<br>G / GCCCCCCC | gnomAD          | p.Pro192AlafsTer38                      | Frameshift insertion | 1/ 134254    | False, mapping artifacts                                                                           |
| 11:61539110 A<br>/ AC       | gnomAD          | p.Ser294LeufsTer44                      | Frameshift insertion | 2/246200     | False, many indels were found in the same individual with excessive mismatches on supporting reads |
| 11:61539113<br>GCC / G      | gnomAD          | p.Pro295ThrfsTer42                      | Frameshift deletion  | 1/246166     |                                                                                                    |
| 11:61539116<br>ACCCT / A    | gnomAD          | p.Pro296GlyfsTer108                     | Frameshift deletion  | 1/246168     |                                                                                                    |
| 11:61539121<br>G / GAGA     | gnomAD          | p.Trp297delinsTer                       | Stop gained          | 2/ 246160    |                                                                                                    |
| 11:61539122<br>GCCTCCCC / G | gnomAD          | p.Pro298ArgfsTer105                     | Frameshift deletion  | 2/246158     |                                                                                                    |
| 11:61547305<br>GGTCCTCA / G | gnomAD          | c.2248-5_2249del                        | Splice acceptor      | 1/245238     | Real                                                                                               |
| 11:61548432<br>G / A        | CDH/CHD Parents | p.Trp829Ter                             | Stop gain            | 1/12,028     | Real; p.Arg749= (synonymous) on the other isoform                                                  |
| 11:61549043<br>A / G        | ExAC            | c.2765-2A>G                             | Splice acceptor      | 1/118730     | Real                                                                                               |
| 11:61550969<br>G / A        | ExAC, gnomAD    | c.3017-1G>A                             | Splice acceptor      | 2/120890     | Real; does not affect the other isoform                                                            |

To find LGD variants in general populations, we first extracted all loss-of-function variants of *MYRF* from gnomAD or ExAC that passed QC. (Note: although ExAC is part of gnomAD, some variants included in ExAC appear missing in gnomAD because they failed QC. So, we first took a union of the two data sets.) In addition, we also searched for the LGD variants in unaffected parents of 362 CDH cases and parents of 2645 CHD cases.

Based on Swiss-Prot, MYRF have two functional isoforms that are encoded by the transcript ENSG00000124920.9(NM\_013279.2) and ENST00000278836.5 (NM\_001127392.2), respectively. Functional consequences in the table above were given with respect to the Ensembl canonical transcript (ENST00000278836.5). LGD variants that affect only non-canonical transcripts were excluded. For the remaining LGD candidates, IGV snapshots were manually reviewed to judge if the variant is real.

We identified four LGD variants that passed manual review from the public and in-house database of over 120K unrelated individuals. However, two of them (p.Trp829Ter, c.3017-1G>A) affect only canonical but not the other functional isoform, and are less likely to cause complete loss of gene function. For the two remaining variants, c.2765-2A>G is a splicing variant that may truncate the protein at the position very close to C terminal end (aa. position >920), c.2248-5\_2249del is a splicing region deletion whose functional consequence remains to be tested by experiment. Taken together, we could only find two splicing variants of *MYRF* in the general populations both of which had unclear functional consequence to the protein.
