# Supplementary material for: De novo variants in congenital diaphragmatic hernia identify MYRF as a new syndrome and reveal genetic overlaps with other developmental disorders
Source: PubMed Central journal article supplement (PMC6301721; doi:10.1371/journal.pgen.1007822), 2018-12-10
Supplement: pgen.1007822.s021.pdf [file pgen.1007822.s021.pdf]

**S6 Tab. Primers used for qPCR of selected differentially expressed genes**

| <b>Gene</b>    | <b>Forward</b>          | <b>Reverse</b>        | <b>Amplicon Size (bp)</b> |
|----------------|-------------------------|-----------------------|---------------------------|
| <i>GATA4</i>   | CGGTGCTTCCAGCAACTCCA    | TGAGAACGTCTGGGACACGGA | 120                       |
| <i>DBNDD2</i>  | CCAGTCGTCTGGGATGGACA    | GCAGGTTGGTGGAGGAGTCG  | 116                       |
| <i>MYO1D</i>   | ACCTCGTGGAGCAACAGCAC    | GCACAGAGCTTTCGGCTGGA  | 148                       |
| <i>H3F3C-1</i> | GGTGGGTCTGTTGGAAGATAC   | ACTGGATGTCTTTGGGCATG  | 77                        |
| <i>H3F3C-2</i> | TGAAGCCTCATCGCTACAGG    | ATCTCCCTCACCAACCTCTG  | 115                       |
| <i>NFASC</i>   | GCAGGACATGCAGACCGACT    | ACTCCTCGGGTGGTGAGGAC  | 105                       |
| <i>SEMA3-1</i> | GCAATAGATGGAGAACACTCTGG | ATTTGGACCTGGCACTGAG   | 147                       |
| <i>SEMA3-2</i> | GGCCAGTATCTTACACCAGAAG  | GGCGTACAAGTGAGTCTGATT | 114                       |
