# Supplementary material for: De novo variants in congenital diaphragmatic hernia identify MYRF as a new syndrome and reveal genetic overlaps with other developmental disorders
Source: PubMed Central journal article supplement (PMC6301721; doi:10.1371/journal.pgen.1007822), 2018-12-10
Supplement: pgen.1007822.s023.pdf [file pgen.1007822.s023.pdf]

## Supplementary References

- Beauchemin, K. J., J. M. Wells, A. T. Kho, V. M. Philip, D. Kamir, I. S. Kohane, J. H. Graber and C. J. Bult (2016). "Temporal dynamics of the developing lung transcriptome in three common inbred strains of laboratory mice reveals multiple stages of postnatal alveolar development." *PeerJ* **4**: e2318.
- Budyak, I. L., A. Zhuravleva and L. M. Gierasch (2013). "The Role of Aromatic-Aromatic Interactions in Strand-Strand Stabilization of beta-Sheets." *J Mol Biol* **425**(18): 3522-3535.
- Bujalka, H., M. Koenning, S. Jackson, V. M. Perreau, B. Pope, C. M. Hay, S. Mitew, A. F. Hill, Q. R. Lu, M. Wegner, R. Srinivasan, J. Svaren, M. Willingham, B. A. Barres and B. Emery (2013). "MYRF is a membrane-associated transcription factor that autoproteolytically cleaves to directly activate myelin genes." *PLoS Biol* **11**(8): e1001625.
- Chen, B., Y. Zhu, S. Ye and R. Zhang (2018). "Structure of the DNA-binding domain of human myelin-gene regulatory factor reveals its potential protein-DNA recognition mode." *J Struct Biol*.
- Dong, C., P. Wei, X. Jian, R. Gibbs, E. Boerwinkle, K. Wang and X. Liu (2015). "Comparison and integration of deleteriousness prediction methods for nonsynonymous SNVs in whole exome sequencing studies." *Hum Mol Genet* **24**(8): 2125-2137.
- Homsy, J., S. Zaidi, Y. Shen, J. S. Ware, K. E. Samocha, K. J. Karczewski, S. R. DePalma, D. McKean, H. Wakimoto, J. Gorham, S. C. Jin, J. Deanfield, A. Giardini, G. A. Porter, Jr., R. Kim, K. Bilguvar, F. Lopez-Giraldez, I. Tikhonova, S. Mane, A. Romano-Adesman, H. Qi, B. Vardarajan, L. Ma, M. Daly, A. E. Roberts, M. W. Russell, S. Mital, J. W. Newburger, J. W. Gaynor, R. E. Breitbart, I. Iossifov, M. Ronemus, S. J. Sanders, J. R. Kaltman, J. G. Seidman, M. Brueckner, B. D. Gelb, E. Goldmuntz, R. P. Lifton, C. E. Seidman and W. K. Chung (2015). "De novo mutations in congenital heart disease with neurodevelopmental and other congenital anomalies." *Science* **350**(6265): 1262-1266.
- Kircher, M., D. M. Witten, P. Jain, B. J. O'Roak, G. M. Cooper and J. Shendure (2014). "A general framework for estimating the relative pathogenicity of human genetic variants." *Nat Genet* **46**(3): 310-315.
- Li, Z., Y. Park and E. M. Marcotte (2013). "A Bacteriophage tailspike domain promotes self-cleavage of a human membrane-bound transcription factor, the myelin regulatory factor MYRF." *PLoS Biol* **11**(8): e1001624.
- Longoni, M., F. A. High, H. Qi, M. P. Joy, R. Hila, C. M. Coletti, J. Wynn, M. Loscertales, L. Shan, C. J. Bult, J. M. Wilson, Y. Shen, W. K. Chung and P. K. Donahoe (2017). "Genome-wide enrichment of damaging de novo variants in patients with isolated and complex congenital diaphragmatic hernia." *Hum Genet* **136**(6): 679-691.
- Longoni, M., F. A. High, M. K. Russell, A. Kashani, A. A. Tracy, C. M. Coletti, R. Hila, A. Shamia, J. Wells, K. G. Ackerman, J. M. Wilson, C. J. Bult, C. Lee, K. Lage, B. R. Pober and P. K. Donahoe (2014). "Molecular pathogenesis of congenital diaphragmatic hernia revealed by exome sequencing, developmental data, and bioinformatics." *Proc Natl Acad Sci U S A* **111**(34): 12450-12455.
- Love, M. I., W. Huber and S. Anders (2014). "Moderated estimation of fold change and dispersion for RNA-seq data with DESeq2." *Genome Biol* **15**(12): 550.
- Russell, M. K., M. Longoni, J. Wells, F. I. Maalouf, A. A. Tracy, M. Loscertales, K. G. Ackerman, B. R. Pober, K. Lage, C. J. Bult and P. K. Donahoe (2012). "Congenital diaphragmatic hernia candidate genes derived from embryonic transcriptomes." *Proc Natl Acad Sci U S A* **109**(8): 2978-2983.
- Samocha, K. E., E. B. Robinson, S. J. Sanders, C. Stevens, A. Sabo, L. M. McGrath, J. A. Kosmicki, K. Rehnstrom, S. Mallick, A. Kirby, D. P. Wall, D. G. MacArthur, S. B. Gabriel, M. DePristo, S. M. Purcell, A.

Palotie, E. Boerwinkle, J. D. Buxbaum, E. H. Cook, Jr., R. A. Gibbs, G. D. Schellenberg, J. S. Sutcliffe, B. Devlin, K. Roeder, B. M. Neale and M. J. Daly (2014). "A framework for the interpretation of de novo mutation in human disease." Nat Genet **46**(9): 944-950.

Schulz, E. C., A. Dickmanns, H. Urlaub, A. Schmitt, M. Muhlenhoff, K. Stummeyer, D. Schwarzer, R. Gerardy-Schahn and R. Ficner (2010). "Crystal structure of an intramolecular chaperone mediating triple-beta-helix folding." Nat Struct Mol Biol **17**(2): 210-215.

Sievers, F., A. Wilm, D. Dineen, T. J. Gibson, K. Karplus, W. Li, R. Lopez, H. McWilliam, M. Remmert, J. Soding, J. D. Thompson and D. G. Higgins (2011). "Fast, scalable generation of high-quality protein multiple sequence alignments using Clustal Omega." Mol Syst Biol **7**: 539.

Yu, L., J. T. Bennett, J. Wynn, G. L. Carvill, Y. H. Cheung, Y. Shen, G. B. Mychaliska, K. S. Azarow, T. M. Crombleholme, D. H. Chung, D. Potoka, B. W. Warner, B. Bucher, F. Y. Lim, J. Pietsch, C. Stolar, G. Aspelund, M. S. Arkovitz, G. University of Washington Center for Mendelian, H. Mefford and W. K. Chung (2014). "Whole exome sequencing identifies de novo mutations in GATA6 associated with congenital diaphragmatic hernia." J Med Genet **51**(3): 197-202.

Yu, L., A. D. Sawle, J. Wynn, G. Aspelund, C. J. Stolar, M. S. Arkovitz, D. Potoka, K. S. Azarow, G. B. Mychaliska, Y. Shen and W. K. Chung (2015). "Increased burden of de novo predicted deleterious variants in complex congenital diaphragmatic hernia." Hum Mol Genet **24**(16): 4764-4773.

Zhen, X., B. Li, F. Hu, S. Yan, G. Meloni, H. Li and N. Shi (2017). "Crystal structure of the DNA-binding domain of Myelin-gene Regulatory Factor." Sci Rep **7**(1): 3696.
